# Supplementary material for: Sequential Isolation and Characterization of Single CTCs and Large CTC Clusters in Metastatic Colorectal Cancer Patients
Source: MDPI journal article supplement (doi:10.3390/cancers13246362), 2021-12-18
Supplement: s1 [file s1]

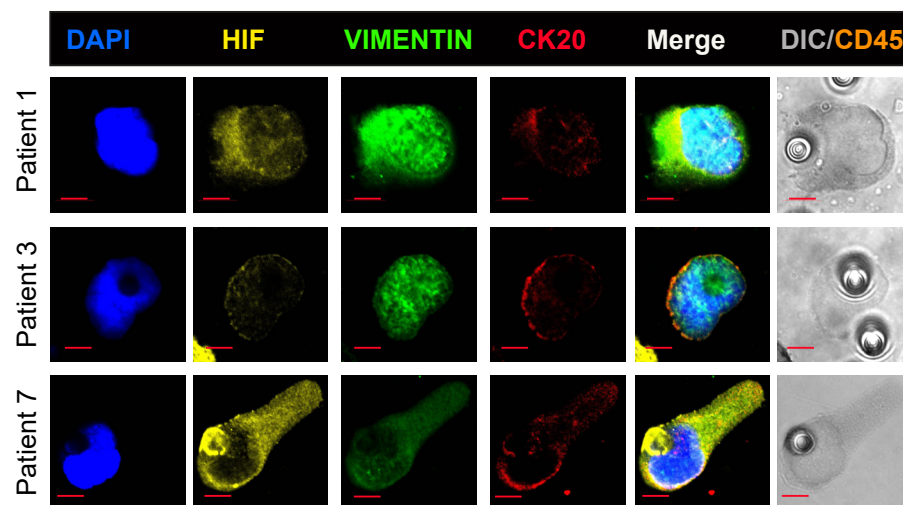

Illustrative images of triple immunofluorescence assay on circulating colon cancer cells clusters. (Left) Representative confocal images of CTC clusters stained with anti-CK20 (red), anti-vimentin (green) and anti-HIF-1 $\alpha$  (yellow) antibodies. Magnification 60x, 5x zoom bar 10  $\mu$ m.

## Supplementary Figure S2
