# Supplementary material for: Sequential Isolation and Characterization of Single CTCs and Large CTC Clusters in Metastatic Colorectal Cancer Patients
Source: MDPI journal article supplement (doi:10.3390/cancers13246362), 2021-12-18
Supplement: s1 [file s1]

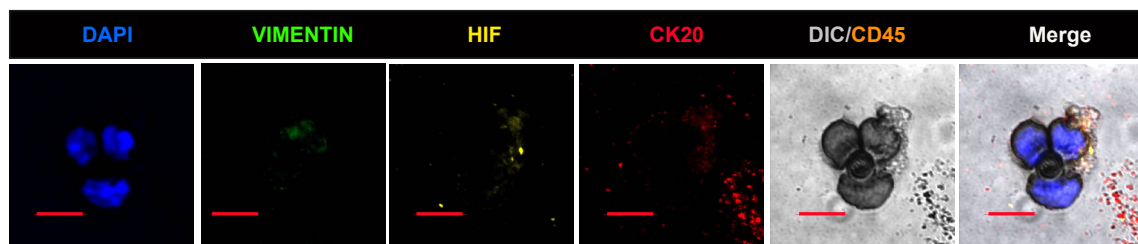

Hematopoietic cells identification. Representative confocal images showing CD45 positive cells observed at differential interference contrast (DIC) stained with diaminobenzidine. Magnification 60x, 5x zoom bar 10  $\mu$ m.

**Supplementary Figure S1**
